# Supplementary material for: Ovarian endometrioma subtypes defined by the ratio of ciliated cells: implications for endometriosis origin and carcinoma histologic subtype
Source: Research Square preprint supplement (doi:10.21203/rs.3.rs-8631039/v1), 2026-01-30
Supplement: Supplementary file 1 [file 2c7ed9479cb961b2d73cf327.xlsx]

## Sheet: Sheet1
Supplemental Table 2 The clinical characteristics of type1 and type2 ovarian endometriosis
	Type 1 Ov EMS	Type 2 Ov EMS
	n=19	n=11	p value
Age (years)	41.00 ± 4.58	37.36 ± 7.50	NS
BMI (m2/kg)	21.68 ± 3.99	21.69 ± 2.72	NS
Gravidity	0.95 ± 1.13	0.45 ± 0.82	NS
Parity	0.74 ± 0.87	0.36 ± 0.67	NS
Proliferative phase	9 (47.4%)	8 (72.7%)	NS
Secretory Phase	10 (52.6%)	3 (27.3%)
Unilateral cyst	13 (68.4%)	6 (54.5%)	NS
Bilateral cyst	6 (31.6%)	5 (45.5%)
Stage of endometriosis (rASRM)
Stage III n, (%)	11 (57.9%)	4 (36.4%)	NS
Stage IV n, (%)	8 (42.1%)	7 (63.6%)
Ov EMS; ovarian endometriosis, NS; not significant
