# Supplementary material for: Ovarian endometrioma subtypes defined by the ratio of ciliated cells: implications for endometriosis origin and carcinoma histologic subtype
Source: Research Square preprint supplement (doi:10.21203/rs.3.rs-8631039/v1), 2026-01-30
Supplement: Supplementary file 3 [file 72451a43f2f6ead79f220ecb.xlsx]

## Sheet: Sheet1
Supplemental Table 1 The characteristics of patients
	Group A	Group B	Group C	Group D	Group E	Group F	Group G	Group H
	EM/FT without EMS	EM/FT with EMS	Ov EMS	DE	PE	CC	EC	Mixed cancer
	n=10	n=7	n=30	n=6	n=3	n=5	n=5	n=1
Age (years)	38.90 ± 4.23	42.29 ± 4.23	39.67 ± 5.97	38.67 ± 3.98	37.00 ± 6.25	51.80 ± 6.50	49.60 ± 9.56	47
BMI (m2/kg)	22.11 ± 3.12	23.71 ± 4.61	21.69 ± 3.52	19.17 ± 3.65	21.83 ± 2.76	23.04 ± 2.56	20.58 ± 3.30	21.7
Gravidity	1.10 ± 1.29	1.29 ± 0.95	0.77 ± 1.04	0.60 ± 1.34	1.00 ± 1.73	0.50 ± 0.58	0.80 ± 1.79	0
Parity	0.50 ± 0.53	1.29 ± 0.95	0.60 ± 0.81	0.40 ± 0.89	1.00 ± 1.73	0.80 ± 0.84	0.60 ± 1.34	0
Proliferative phase	4 (40%)	4 (57%)	17 (56.7%)	3 (50%)	3 (100%)	N/A	N/A	N/A
Secretory Phase	6 (60%)	3 (42.9%)	13 (43.3%)	2 (33.3%)	0	N/A	N/A	N/A
Not determined	0 (0%)	0 (0%)	0 (0%)	1 (16.7%)	0	N/A	N/A	N/A
Stage of endometriosis (reASRM)
Stage I n, (%)	N/A	0 (0%)	0 (0%)	0 (0%)	1 (33.3%)	N/A	N/A	N/A
Stage II n, (%)	N/A	0 (0%)	0 (0%)	0 (0%)	0 (0%)	N/A	N/A	N/A
Stage III n, (%)	N/A	2 (28.6%)	15 (50.0%)	0 (0%)	1 (33.3%)	N/A	N/A	N/A
Stage IV n, (%)	N/A	5 (71.4%)	15 (50.0%)	3 (50.0%)	1 (33.3%)	N/A	N/A	N/A
data missing	N/A	0 (0%)	0 (0%)	3 (50.0%)	0 (0%)	N/A	N/A	N/A
EM; endometrium, FT; fallopian tube, EMS; endometriosis, Ov EMS; ovarian endometriosis, DE; deep endometriosis, PE; peritoneal endometriosis, CC; clear cell carcinoma, EC; endometrioid carcinoma, N/A; not applicable, NS; not significant
